# Supplementary figures and images for: Human blindsight is mediated by an intact geniculo-extrastriate pathway
Source: eLife journal article supplement (doi:10.7554/elife.08935), 2015-10-20

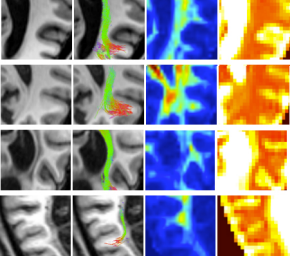

Supplement: supp [file elife-08935-supp-v1.zip]
